# Supplementary material for: Is the bipyridyl thorium metallocene a low-valent thorium complex? A combined experimental and computational study
Source: Royal Society of Chemistry journal article supplement (doi:10.1039/c2sc22013j), 2013-01-01
Supplement: c2sc22013j.pdf [file c2sc22013j.pdf]

Supporting information for

# Is the bipyridyl thorium metallocene a low-valent thorium complex? A combined experimental and computational study

*Wenshan Ren, Wayne W. Lukens, Guofu Zi,\* Laurent Maron,\* and Marc D. Walter\**

E-mail: [gzi@bnu.edu.cn](mailto:gzi@bnu.edu.cn); [laurent.maron@irsamc.ups-tlse.fr](mailto:laurent.maron@irsamc.ups-tlse.fr); [mwalter@tu-bs.de](mailto:mwalter@tu-bs.de)

*Table of Content:*

|                                                             |    |
|-------------------------------------------------------------|----|
| 1. Magnetic Susceptibility Studies on <b>1</b> and <b>2</b> | S2 |
| 2. Computational Details                                    | S4 |

## 1. Magnetic Susceptibility Studies on Complexes 1 and 2

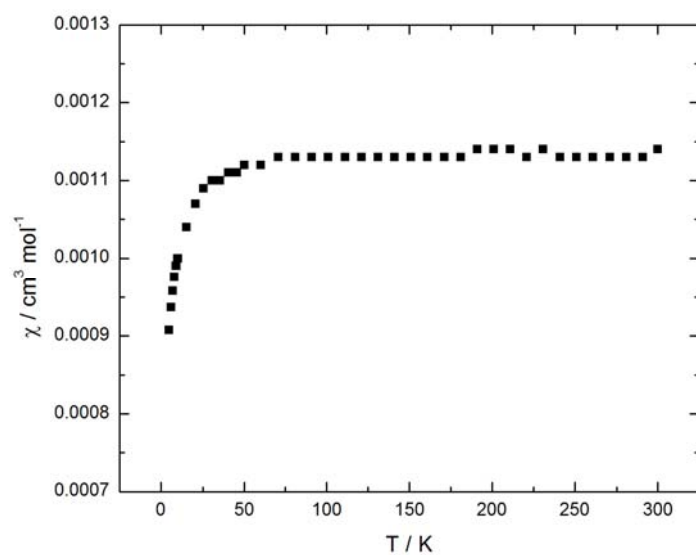

**Figure S1.**  $\chi$  vs. T plot for **1** recorded at 1kG (uncorrected for ferromagnetic impurities).

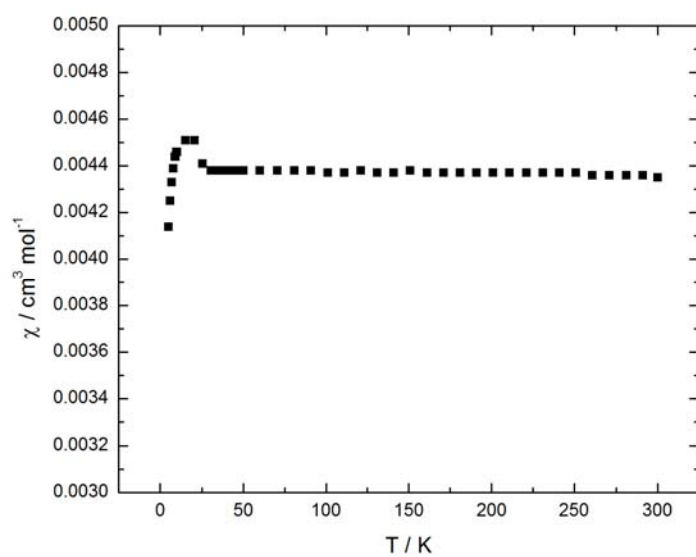

**Figure S2.**  $\chi$  vs. T plot for **2** recorded at 1kG (uncorrected for ferromagnetic impurities).

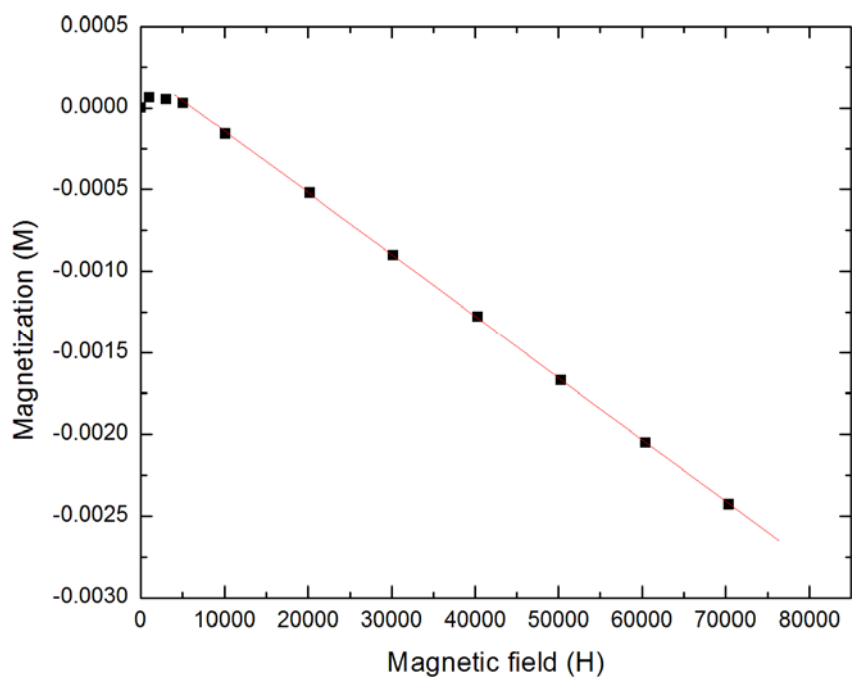

**Figure S3.** M vs. H plot for **1** recorded at 300 K and at variable magnetic field (H) 0-70 kG. Linear fit results:  $\chi_{\text{raw}} = -3.78 \times 10^{-8}$ ,  $M_{\text{ferro}} = 2.37 \times 10^{-4}$ .

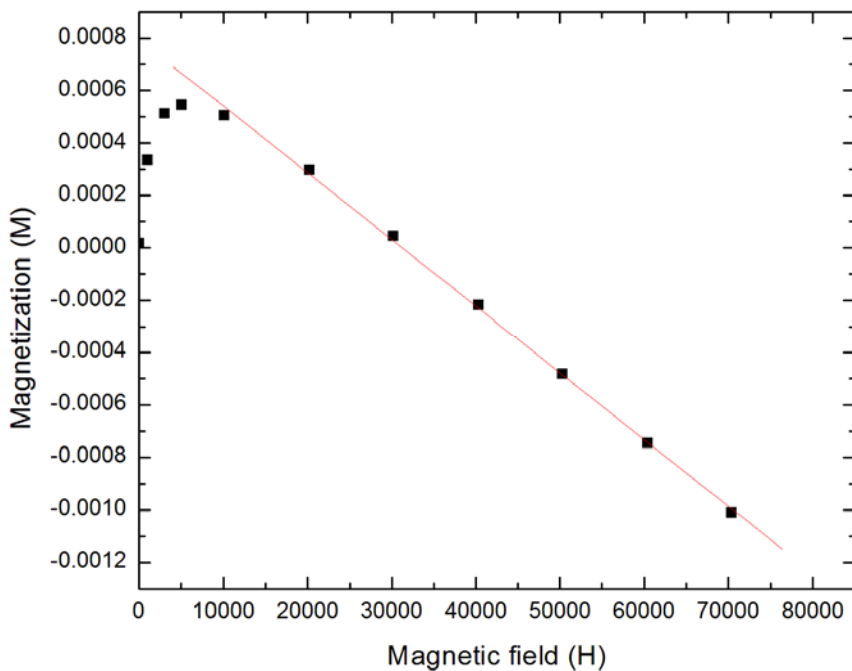

**Figure S4.** M vs. H plot for **2** recorded at 300 K and at variable magnetic field (H) 0-70 kG. Linear fit results:  $\chi_{\text{raw}} = -2.55 \times 10^{-8}$ ,  $M_{\text{ferro}} = 7.94 \times 10^{-4}$ .

**Table S1.** Corrected magnetic susceptibility data for **1**

| T (K)                  | $\chi_{\text{raw}}$      | MW (g mol <sup>-1</sup> ) | mass (g) | $\chi_{\text{mol}}$ (cm <sup>3</sup> mol <sup>-1</sup> ) | Pascal's constants       | $\chi_{\text{TIP}}$ (cm <sup>3</sup> mol <sup>-1</sup> ) |
|------------------------|--------------------------|---------------------------|----------|----------------------------------------------------------|--------------------------|----------------------------------------------------------|
| 200                    | -3.82 x 10 <sup>-8</sup> | 855                       | 0.083    | -3.94 x 10 <sup>-4</sup>                                 | -4.82 x 10 <sup>-4</sup> | 8.80 x 10 <sup>-5</sup>                                  |
| 250                    | -3.72 x 10 <sup>-8</sup> | 855                       | 0.083    | -3.83 x 10 <sup>-4</sup>                                 | -4.82 x 10 <sup>-4</sup> | 9.88 x 10 <sup>-5</sup>                                  |
| 300                    | -3.78 x 10 <sup>-8</sup> | 855                       | 0.083    | -3.90 x 10 <sup>-4</sup>                                 | -4.82 x 10 <sup>-4</sup> | 9.22 x 10 <sup>-5</sup>                                  |
| Average                |                          |                           |          |                                                          |                          | 9.30 x 10 <sup>-5</sup>                                  |
| $\sigma_{\text{mean}}$ |                          |                           |          |                                                          |                          | 3.13 x 10 <sup>-6</sup>                                  |

**Table S2.** Corrected magnetic susceptibility data for **2**

| T (K)                  | $\chi_{\text{raw}}$      | MW (g mol <sup>-1</sup> ) | mass (g) | $\chi_{\text{mol}}$ (cm <sup>3</sup> mol <sup>-1</sup> ) | Pascal's constants       | $\chi_{\text{TIP}}$ (cm <sup>3</sup> mol <sup>-1</sup> ) |
|------------------------|--------------------------|---------------------------|----------|----------------------------------------------------------|--------------------------|----------------------------------------------------------|
| 200                    | -2.53 x 10 <sup>-8</sup> | 743                       | 0.061    | -3.09 x 10 <sup>-4</sup>                                 | -3.93 x 10 <sup>-4</sup> | 8.42 x 10 <sup>-5</sup>                                  |
| 250                    | -2.54 x 10 <sup>-8</sup> | 743                       | 0.061    | -3.09 x 10 <sup>-4</sup>                                 | -3.93 x 10 <sup>-4</sup> | 8.37 x 10 <sup>-5</sup>                                  |
| 300                    | -2.55 x 10 <sup>-8</sup> | 743                       | 0.061    | -3.10 x 10 <sup>-4</sup>                                 | -3.93 x 10 <sup>-4</sup> | 8.30 x 10 <sup>-5</sup>                                  |
| Average                |                          |                           |          |                                                          |                          | 8.36 x 10 <sup>-5</sup>                                  |
| $\sigma_{\text{mean}}$ |                          |                           |          |                                                          |                          | 3.71 x 10 <sup>-7</sup>                                  |

## 2. Computational Details

### Complex 2 singlet

89

scf done: -1918.852167

|   |           |          |           |
|---|-----------|----------|-----------|
| C | 0.821672  | 1.482890 | 9.156080  |
| H | 0.437566  | 0.808368 | 9.917902  |
| C | 1.120828  | 1.037231 | 7.905477  |
| H | 0.938737  | 0.003965 | 7.632727  |
| C | 1.768861  | 1.947353 | 7.002581  |
| H | 2.140771  | 1.588998 | 6.046743  |
| C | 1.926064  | 3.251717 | 7.351144  |
| H | 2.415433  | 3.939624 | 6.669403  |
| C | 1.381757  | 3.742812 | 8.600121  |
| C | 1.161698  | 5.110012 | 8.863315  |
| C | 1.370731  | 6.155428 | 7.887886  |
| H | 1.854961  | 5.920644 | 6.946233  |
| C | 0.866854  | 7.402280 | 8.095869  |
| H | 0.979638  | 8.167748 | 7.333317  |
| C | 0.161438  | 7.699767 | 9.308956  |
| H | -0.295493 | 8.669015 | 9.473567  |
| C | 0.117870  | 6.741966 | 10.274888 |
| H | -0.343082 | 6.930222 | 11.241747 |
| C | -0.138279 | 4.555017 | 13.271341 |
| H | -0.671407 | 5.497866 | 13.229370 |
| C | -0.587994 | 3.344058 | 12.679087 |
| C | 0.365833  | 2.352695 | 13.034209 |
| H | 0.323509  | 1.302474 | 12.769993 |

|   |           |           |           |
|---|-----------|-----------|-----------|
| C | 1.343420  | 2.942037  | 13.885609 |
| H | 2.155809  | 2.410128  | 14.364343 |
| C | 1.023562  | 4.313300  | 14.057791 |
| C | 4.595298  | 4.989369  | 10.872291 |
| C | 4.519702  | 4.733705  | 12.267081 |
| H | 4.581409  | 5.480608  | 13.050206 |
| C | 4.466996  | 3.332237  | 12.472427 |
| H | 4.464024  | 2.840064  | 13.437621 |
| C | 4.497455  | 2.686416  | 11.208567 |
| C | 4.544022  | 3.720230  | 10.229562 |
| H | 4.592070  | 3.559197  | 9.160272  |
| C | 4.943640  | 6.333282  | 10.239400 |
| C | 3.974834  | 7.438817  | 10.689821 |
| H | 3.957910  | 7.534299  | 11.781210 |
| H | 2.954362  | 7.247477  | 10.342149 |
| H | 4.283962  | 8.408705  | 10.283005 |
| C | 6.369873  | 6.706601  | 10.698203 |
| H | 6.421314  | 6.824776  | 11.785213 |
| H | 6.684369  | 7.651318  | 10.238936 |
| H | 7.087968  | 5.931622  | 10.411154 |
| C | 4.940063  | 6.248447  | 8.708074  |
| H | 5.204472  | 7.221585  | 8.280111  |
| H | 3.954538  | 5.973341  | 8.322873  |
| H | 5.671921  | 5.518024  | 8.347623  |
| C | 4.672028  | 1.188308  | 10.981700 |
| C | 4.630129  | 0.842974  | 9.488079  |
| H | 5.437518  | 1.343023  | 8.943051  |
| H | 3.678444  | 1.128196  | 9.030204  |
| H | 4.758968  | -0.236430 | 9.350665  |
| C | 6.049484  | 0.779717  | 11.543701 |
| H | 6.851407  | 1.340439  | 11.052842 |
| H | 6.229774  | -0.289426 | 11.379138 |
| H | 6.116101  | 0.973216  | 12.619163 |
| C | 3.582699  | 0.386136  | 11.713296 |
| H | 3.748761  | -0.690905 | 11.594926 |
| H | 2.589611  | 0.610705  | 11.306490 |
| H | 3.573592  | 0.603322  | 12.786786 |
| C | 1.601681  | 5.294461  | 15.072090 |
| C | 0.556190  | 5.477128  | 16.193945 |
| H | -0.377766 | 5.892197  | 15.802695 |
| H | 0.935056  | 6.159307  | 16.964275 |
| H | 0.323946  | 4.519064  | 16.669702 |
| C | 2.891081  | 4.758926  | 15.708197 |
| H | 2.711563  | 3.814784  | 16.232982 |
| H | 3.273660  | 5.475408  | 16.443192 |
| H | 3.676165  | 4.589868  | 14.966664 |
| C | 1.871418  | 6.665698  | 14.430551 |
| H | 2.614423  | 6.597719  | 13.628263 |
| H | 2.252408  | 7.372834  | 15.176145 |
| H | 0.959201  | 7.096003  | 14.005112 |
| C | -1.979099 | 3.125410  | 12.091508 |
| C | -2.958273 | 3.081427  | 13.286735 |
| H | -2.700133 | 2.271468  | 13.976941 |
| H | -3.983096 | 2.916188  | 12.933636 |
| H | -2.939744 | 4.020511  | 13.848953 |
| C | -2.398371 | 4.263404  | 11.150028 |
| H | -2.392426 | 5.233370  | 11.658253 |
| H | -3.418921 | 4.092598  | 10.788906 |
| H | -1.729865 | 4.329558  | 10.288308 |
| C | -2.085395 | 1.796533  | 11.334783 |
| H | -1.456209 | 1.799236  | 10.442625 |
| H | -3.119952 | 1.634843  | 11.012788 |
| H | -1.804723 | 0.945184  | 11.964540 |

|    |          |          |           |
|----|----------|----------|-----------|
| N  | 1.028348 | 2.771002 | 9.579779  |
| N  | 0.684859 | 5.501864 | 10.140149 |
| Th | 1.929638 | 3.959486 | 11.356786 |

**Complex 2 triplet**

89

scf done: -1918.838251

|   |           |           |           |
|---|-----------|-----------|-----------|
| C | 1.523333  | 2.130530  | 8.632168  |
| H | 1.892598  | 1.410619  | 9.359574  |
| C | 1.238024  | 1.746301  | 7.343835  |
| H | 1.386755  | 0.718107  | 7.033843  |
| C | 0.743641  | 2.730691  | 6.452890  |
| H | 0.503757  | 2.475933  | 5.424852  |
| C | 0.564868  | 4.013807  | 6.908815  |
| H | 0.184149  | 4.773627  | 6.235247  |
| C | 0.876574  | 4.358021  | 8.248035  |
| C | 0.710891  | 5.667363  | 8.797244  |
| C | 0.173832  | 6.764176  | 8.077288  |
| H | -0.126641 | 6.630139  | 7.044006  |
| C | 0.021400  | 7.990821  | 8.675544  |
| H | -0.393370 | 8.825437  | 8.118203  |
| C | 0.411160  | 8.147950  | 10.028358 |
| H | 0.308625  | 9.095267  | 10.545679 |
| C | 0.936170  | 7.057101  | 10.679606 |
| H | 1.255933  | 7.137395  | 11.715939 |
| C | -0.187352 | 4.482193  | 13.121041 |
| H | -0.755757 | 5.388715  | 12.946325 |
| C | -0.475285 | 3.219844  | 12.536458 |
| C | 0.484469  | 2.304062  | 13.052884 |
| H | 0.515276  | 1.238077  | 12.867406 |
| C | 1.318290  | 3.004876  | 13.971961 |
| H | 2.101126  | 2.551924  | 14.566983 |
| C | 0.898039  | 4.362897  | 14.037089 |
| C | 4.749361  | 4.741592  | 10.824227 |
| C | 4.604766  | 4.780118  | 12.239153 |
| H | 4.663539  | 5.665140  | 12.860255 |
| C | 4.493485  | 3.440698  | 12.712623 |
| H | 4.446658  | 3.151729  | 13.755780 |
| C | 4.569556  | 2.549414  | 11.602223 |
| C | 4.694458  | 3.373171  | 10.447123 |
| H | 4.790738  | 3.005769  | 9.432409  |
| C | 5.153004  | 5.899261  | 9.918410  |
| C | 4.770793  | 7.254704  | 10.529430 |
| H | 5.252189  | 7.410852  | 11.500427 |
| H | 3.688911  | 7.345254  | 10.664364 |
| H | 5.093708  | 8.067984  | 9.870095  |
| C | 6.689192  | 5.848525  | 9.766568  |
| H | 7.182311  | 5.931737  | 10.740583 |
| H | 7.041883  | 6.671297  | 9.132821  |
| H | 7.006928  | 4.905792  | 9.309741  |
| C | 4.516109  | 5.779213  | 8.526152  |
| H | 4.852469  | 6.601597  | 7.884399  |
| H | 3.424776  | 5.820848  | 8.582271  |
| H | 4.794744  | 4.843092  | 8.032103  |
| C | 4.828803  | 1.048252  | 11.689007 |
| C | 4.762101  | 0.381113  | 10.309575 |
| H | 5.510580  | 0.794297  | 9.625828  |
| H | 3.777637  | 0.505073  | 9.848688  |
| H | 4.955518  | -0.693274 | 10.401175 |
| C | 6.256467  | 0.855763  | 12.246624 |
| H | 6.994961  | 1.346209  | 11.604171 |
| H | 6.507993  | -0.210082 | 12.306208 |
| H | 6.350143  | 1.283597  | 13.249696 |

|    |           |           |           |
|----|-----------|-----------|-----------|
| C  | 3.835042  | 0.351749  | 12.630382 |
| H  | 4.081966  | -0.711491 | 12.733432 |
| H  | 2.812455  | 0.430284  | 12.244434 |
| H  | 3.853744  | 0.793377  | 13.632242 |
| C  | 1.293228  | 5.387421  | 15.095822 |
| C  | 0.199506  | 5.373024  | 16.185758 |
| H  | -0.773809 | 5.652588  | 15.770084 |
| H  | 0.442793  | 6.078135  | 16.989922 |
| H  | 0.101023  | 4.374959  | 16.624785 |
| C  | 2.635603  | 5.031301  | 15.748987 |
| H  | 2.601503  | 4.050021  | 16.233117 |
| H  | 2.886298  | 5.768581  | 16.519643 |
| H  | 3.447102  | 5.024290  | 15.014643 |
| C  | 1.394198  | 6.804146  | 14.514299 |
| H  | 2.188466  | 6.851533  | 13.760530 |
| H  | 1.627527  | 7.528120  | 15.303653 |
| H  | 0.455135  | 7.118359  | 14.046701 |
| C  | -1.724740 | 2.868023  | 11.736196 |
| C  | -2.871766 | 2.662669  | 12.749775 |
| H  | -2.628032 | 1.864982  | 13.458981 |
| H  | -3.799585 | 2.389767  | 12.232567 |
| H  | -3.056503 | 3.576565  | 13.323377 |
| C  | -2.119796 | 3.992378  | 10.767336 |
| H  | -2.285310 | 4.939641  | 11.290067 |
| H  | -3.052672 | 3.734842  | 10.252771 |
| H  | -1.351704 | 4.156873  | 10.006303 |
| C  | -1.539982 | 1.567115  | 10.941905 |
| H  | -0.730836 | 1.652782  | 10.210534 |
| H  | -2.459303 | 1.327446  | 10.395978 |
| H  | -1.320934 | 0.719816  | 11.599772 |
| N  | 1.371630  | 3.390438  | 9.109307  |
| N  | 1.102624  | 5.834020  | 10.117472 |
| Th | 2.085986  | 3.924127  | 11.489894 |

**SCPh<sub>2</sub> adduct singlet**

113

scf done: -2818.201662

|    |          |           |           |
|----|----------|-----------|-----------|
| N  | 1.289847 | 5.156642  | 10.224563 |
| C  | 1.434339 | 4.629359  | 8.917388  |
| C  | 1.724370 | 5.564907  | 7.855765  |
| C  | 1.592613 | 6.903930  | 8.062970  |
| C  | 1.210123 | 7.398812  | 9.352645  |
| C  | 1.092188 | 6.504522  | 10.372570 |
| C  | 1.271152 | 3.243652  | 8.711643  |
| C  | 1.472354 | 2.602042  | 7.428918  |
| C  | 0.944518 | 1.372862  | 7.188449  |
| C  | 0.240148 | 0.679106  | 8.231159  |
| C  | 0.263138 | 1.213598  | 9.482492  |
| N  | 0.851045 | 2.413892  | 9.791617  |
| Th | 2.303160 | 3.372053  | 11.324641 |
| C  | 4.546375 | 2.432876  | 9.813111  |
| C  | 5.019317 | 3.660378  | 10.357996 |
| C  | 5.118460 | 3.462765  | 11.760502 |
| C  | 4.751064 | 2.127270  | 12.060728 |
| C  | 4.406902 | 1.467910  | 10.851782 |
| C  | 5.574012 | 4.860826  | 9.597732  |
| C  | 5.286002 | 4.751637  | 8.095625  |
| C  | 4.164132 | -0.030385 | 10.699396 |
| C  | 3.041795 | -0.510496 | 11.635118 |
| C  | 4.997219 | 6.181949  | 10.132245 |
| C  | 7.105041 | 4.871726  | 9.796516  |
| C  | 3.801999 | -0.392274 | 9.253820  |
| C  | 5.468750 | -0.762989 | 11.076862 |

|   |           |           |           |
|---|-----------|-----------|-----------|
| C | 0.826370  | 4.502865  | 13.518509 |
| C | -0.015106 | 3.448874  | 13.070448 |
| C | 0.695080  | 2.242987  | 13.318184 |
| C | 1.921278  | 2.560407  | 13.968571 |
| C | 2.002559  | 3.968428  | 14.117550 |
| C | -1.495719 | 3.596790  | 12.732917 |
| C | -2.049170 | 2.372834  | 11.994439 |
| C | 2.974307  | 4.767132  | 14.979742 |
| C | 3.466143  | 6.027965  | 14.250071 |
| C | 2.215163  | 5.203164  | 16.251967 |
| C | 4.177301  | 3.918859  | 15.412590 |
| C | -2.239427 | 3.729745  | 14.081529 |
| C | -1.776590 | 4.847506  | 11.888416 |
| H | -0.155554 | 0.679002  | 10.332260 |
| H | -0.236118 | -0.278159 | 8.051880  |
| H | 1.062080  | 0.909083  | 6.212952  |
| H | 2.004826  | 3.126381  | 6.641967  |
| H | 1.960909  | 5.192873  | 6.864836  |
| H | 1.757447  | 7.597905  | 7.243316  |
| H | 1.054728  | 8.455973  | 9.533655  |
| H | 0.874903  | 6.830744  | 11.386305 |
| H | 0.560585  | 5.553652  | 13.508854 |
| H | 0.338572  | 1.238795  | 13.120309 |
| H | 2.636689  | 1.836888  | 14.338480 |
| H | 5.493393  | 4.186725  | 12.474796 |
| H | 4.790660  | 1.672999  | 13.043399 |
| H | 4.369765  | 2.242532  | 8.762208  |
| H | 5.202368  | 6.305917  | 11.201189 |
| H | 3.914663  | 6.241511  | 9.979791  |
| H | 5.449293  | 7.035426  | 9.613735  |
| H | 7.369174  | 4.984417  | 10.852793 |
| H | 7.557337  | 5.703582  | 9.243300  |
| H | 7.552838  | 3.939346  | 9.437294  |
| H | 5.704340  | 5.617533  | 7.570937  |
| H | 4.211664  | 4.728799  | 7.895045  |
| H | 5.740448  | 3.852208  | 7.667012  |
| H | 4.611569  | -0.128089 | 8.565429  |
| H | 2.890604  | 0.113355  | 8.922084  |
| H | 3.636785  | -1.472278 | 9.169211  |
| H | 6.295818  | -0.438317 | 10.437291 |
| H | 5.349395  | -1.846647 | 10.957554 |
| H | 5.752018  | -0.565397 | 12.115688 |
| H | 2.920477  | -1.597997 | 11.568554 |
| H | 2.081734  | -0.056541 | 11.363764 |
| H | 3.255443  | -0.264637 | 12.680821 |
| H | 1.360496  | 5.840599  | 16.005597 |
| H | 2.877278  | 5.766747  | 16.920080 |
| H | 1.838477  | 4.332453  | 16.798440 |
| H | 3.860891  | 3.049713  | 15.998784 |
| H | 4.848853  | 4.513223  | 16.041518 |
| H | 4.752990  | 3.558403  | 14.556200 |
| H | 4.022329  | 5.777917  | 13.340011 |
| H | 4.133895  | 6.610440  | 14.894864 |
| H | 2.635713  | 6.681093  | 13.964314 |
| H | -2.074875 | 2.848221  | 14.710004 |
| H | -3.318161 | 3.833685  | 13.913646 |
| H | -1.894534 | 4.607171  | 14.638019 |
| H | -1.449282 | 5.761877  | 12.394231 |
| H | -2.853854 | 4.942620  | 11.710145 |
| H | -1.268109 | 4.793636  | 10.922887 |
| H | -1.595277 | 2.273578  | 11.006550 |
| H | -3.131221 | 2.479040  | 11.858725 |
| H | -1.882433 | 1.447084  | 12.556039 |



|   |           |           |           |
|---|-----------|-----------|-----------|
| S | 2.190880  | 9.866435  | 12.790999 |
| C | 1.335624  | 11.246813 | 12.478263 |
| C | 2.029469  | 12.527819 | 12.219774 |
| C | -0.143649 | 11.236772 | 12.446189 |
| C | -0.848483 | 12.043814 | 11.534435 |
| C | -2.236975 | 11.982114 | 11.458888 |
| C | -2.947386 | 11.135659 | 12.308277 |
| C | -2.260680 | 10.338186 | 13.226175 |
| C | -0.873905 | 10.379078 | 13.286727 |
| H | -0.300126 | 12.696517 | 10.862486 |
| H | -2.763912 | 12.595315 | 10.733377 |
| H | -4.031809 | 11.095435 | 12.255629 |
| H | -2.810167 | 9.681740  | 13.894898 |
| H | -0.331094 | 9.755172  | 13.989946 |
| C | 1.478612  | 13.745698 | 12.659020 |
| C | 2.164275  | 14.942483 | 12.471985 |
| C | 3.397285  | 14.948238 | 11.821932 |
| C | 3.950438  | 13.747458 | 11.372229 |
| C | 3.280341  | 12.548832 | 11.578961 |
| H | 0.524369  | 13.745398 | 13.176272 |
| H | 1.734705  | 15.871374 | 12.836301 |
| H | 3.926941  | 15.884095 | 11.666418 |
| H | 4.908413  | 13.747548 | 10.860028 |
| H | 3.707904  | 11.609262 | 11.243346 |

**SCPh<sub>2</sub> adduct triplet**

113

scf done: -2818.223956

|    |           |          |           |
|----|-----------|----------|-----------|
| N  | 1.274190  | 5.657554 | 9.270235  |
| C  | 1.084338  | 4.891122 | 8.129270  |
| C  | 0.715939  | 5.505371 | 6.907448  |
| C  | 0.490171  | 6.858092 | 6.841653  |
| C  | 0.627233  | 7.626961 | 8.019557  |
| C  | 1.018069  | 6.990108 | 9.173381  |
| C  | 1.240063  | 3.482498 | 8.284084  |
| C  | 0.993935  | 2.539253 | 7.255472  |
| C  | 1.053868  | 1.191215 | 7.506393  |
| C  | 1.366644  | 0.755258 | 8.818675  |
| C  | 1.632412  | 1.711027 | 9.768275  |
| N  | 1.600662  | 3.047083 | 9.547806  |
| Th | 2.257015  | 4.632810 | 11.400327 |
| C  | 4.737453  | 3.457663 | 10.368544 |
| C  | 5.034717  | 4.828279 | 10.608200 |
| C  | 4.965981  | 5.008029 | 12.017046 |
| C  | 4.664393  | 3.760911 | 12.619381 |
| C  | 4.577401  | 2.768787 | 11.602054 |
| C  | 5.630611  | 5.781146 | 9.571602  |
| C  | 4.654562  | 6.063917 | 8.419776  |
| C  | 4.823240  | 1.270307 | 11.822762 |
| C  | 3.831136  | 0.603519 | 12.785871 |
| C  | 6.056979  | 7.104738 | 10.220467 |
| C  | 6.892302  | 5.107276 | 8.989235  |
| C  | 4.857486  | 0.490447 | 10.500170 |
| C  | 6.231653  | 1.160448 | 12.454940 |
| C  | 0.271847  | 5.095687 | 13.398490 |
| C  | -0.436131 | 4.417007 | 12.365021 |
| C  | 0.095788  | 3.102925 | 12.313443 |
| C  | 1.073148  | 2.966040 | 13.330967 |
| C  | 1.172118  | 4.192622 | 14.039778 |
| C  | -1.732018 | 4.865897 | 11.695866 |
| C  | -1.939424 | 4.190043 | 10.333177 |
| C  | 1.821116  | 4.395010 | 15.410778 |
| C  | 2.849234  | 5.534256 | 15.430448 |

|   |           |           |           |
|---|-----------|-----------|-----------|
| C | 0.691537  | 4.742589  | 16.405147 |
| C | 2.492169  | 3.103670  | 15.899244 |
| C | -2.882497 | 4.438228  | 12.635262 |
| C | -1.793232 | 6.386353  | 11.519140 |
| H | 1.893749  | 1.415011  | 10.779871 |
| H | 1.407515  | -0.296754 | 9.077659  |
| H | 0.853320  | 0.473882  | 6.716614  |
| H | 0.733120  | 2.888719  | 6.262942  |
| H | 0.605467  | 4.897271  | 6.016768  |
| H | 0.207149  | 7.323904  | 5.902433  |
| H | 0.456590  | 8.697019  | 8.031740  |
| H | 1.153304  | 7.557610  | 10.085973 |
| H | 0.094485  | 6.117697  | 13.711703 |
| H | -0.237650 | 2.312540  | 11.654194 |
| H | 1.597426  | 2.052276  | 13.576192 |
| H | 5.153716  | 5.931517  | 12.549430 |
| H | 4.636758  | 3.576028  | 13.685888 |
| H | 4.747551  | 2.983992  | 9.394603  |
| H | 6.827299  | 6.940872  | 10.981951 |
| H | 5.214276  | 7.615003  | 10.695314 |
| H | 6.479696  | 7.771380  | 9.460539  |
| H | 7.606371  | 4.859282  | 9.781352  |
| H | 7.388658  | 5.783279  | 8.283082  |
| H | 6.648610  | 4.184193  | 8.453788  |
| H | 5.137808  | 6.679608  | 7.652185  |
| H | 3.769800  | 6.600952  | 8.772066  |
| H | 4.318775  | 5.138509  | 7.939285  |
| H | 5.659602  | 0.852595  | 9.849232  |
| H | 3.918636  | 0.559168  | 9.945885  |
| H | 5.052057  | -0.568748 | 10.702288 |
| H | 6.980902  | 1.646765  | 11.822575 |
| H | 6.513724  | 0.107302  | 12.573139 |
| H | 6.265361  | 1.634300  | 13.440540 |
| H | 4.154368  | -0.419894 | 13.007622 |
| H | 2.822681  | 0.539903  | 12.366270 |
| H | 3.770938  | 1.141305  | 13.736805 |
| H | 0.214803  | 5.693208  | 16.149790 |
| H | 1.095933  | 4.830483  | 17.420604 |
| H | -0.079867 | 3.965536  | 16.410905 |
| H | 1.774946  | 2.279645  | 15.975261 |
| H | 2.923065  | 3.263358  | 16.893405 |
| H | 3.304462  | 2.787147  | 15.237630 |
| H | 3.716467  | 5.312916  | 14.802284 |
| H | 3.209344  | 5.699656  | 16.452983 |
| H | 2.411206  | 6.463780  | 15.065031 |
| H | -2.888131 | 3.353206  | 12.781915 |
| H | -3.850272 | 4.730616  | 12.210285 |
| H | -2.783941 | 4.911089  | 13.617610 |
| H | -1.695548 | 6.909275  | 12.473955 |
| H | -2.756105 | 6.673008  | 11.081131 |
| H | -1.005371 | 6.745323  | 10.851669 |
| H | -1.153637 | 4.464603  | 9.624978  |
| H | -2.900303 | 4.500765  | 9.908111  |
| H | -1.958835 | 3.098725  | 10.416685 |
| S | 2.832595  | 7.372571  | 12.100907 |
| C | 1.808423  | 8.802880  | 12.143890 |
| C | 2.010111  | 9.877192  | 11.193941 |
| C | 0.888805  | 8.980246  | 13.286231 |
| C | -0.463318 | 9.320305  | 13.093572 |
| C | -1.322518 | 9.497701  | 14.176063 |
| C | -0.852036 | 9.350827  | 15.480654 |
| C | 0.489283  | 9.028375  | 15.690493 |
| C | 1.346014  | 8.843840  | 14.608649 |

|   |           |           |           |
|---|-----------|-----------|-----------|
| H | -0.839968 | 9.434180  | 12.081149 |
| H | -2.364814 | 9.749204  | 13.997565 |
| H | -1.521412 | 9.492769  | 16.324543 |
| H | 0.874087  | 8.930615  | 16.702295 |
| H | 2.394882  | 8.617888  | 14.774728 |
| C | 1.415300  | 11.155060 | 11.380670 |
| C | 1.619952  | 12.188602 | 10.478062 |
| C | 2.431064  | 12.008188 | 9.354624  |
| C | 3.046352  | 10.769053 | 9.160592  |
| C | 2.845851  | 9.729239  | 10.056913 |
| H | 0.805648  | 11.335820 | 12.258956 |
| H | 1.150739  | 13.152328 | 10.659937 |
| H | 2.590472  | 12.821069 | 8.651860  |
| H | 3.693080  | 10.611914 | 8.300964  |
| H | 3.340378  | 8.777631  | 9.899701  |

**Product- Complex 4**

113

scf done: -2818.243628

|   |           |           |           |
|---|-----------|-----------|-----------|
| C | 3.801461  | -1.984191 | 16.977367 |
| H | 4.075639  | -1.157806 | 16.331231 |
| C | 2.495469  | -2.151467 | 17.397070 |
| H | 1.725620  | -1.456785 | 17.079620 |
| C | 2.216523  | -3.222137 | 18.253564 |
| H | 1.213895  | -3.373216 | 18.642811 |
| C | 3.233615  | -4.093760 | 18.595556 |
| H | 3.036563  | -4.925417 | 19.260098 |
| C | 4.530490  | -3.895207 | 18.089756 |
| C | 5.636035  | -4.842142 | 18.291155 |
| C | 5.344962  | -6.117609 | 18.717096 |
| H | 4.331776  | -6.410628 | 18.956673 |
| C | 6.388190  | -7.102839 | 18.711177 |
| H | 6.151328  | -8.134259 | 18.959211 |
| C | 7.640406  | -6.752210 | 18.368939 |
| H | 8.430186  | -7.494023 | 18.314186 |
| C | 8.021519  | -5.341001 | 18.001868 |
| H | 8.481551  | -5.389878 | 17.000739 |
| C | 9.228101  | -4.779428 | 18.857838 |
| C | 8.986618  | -4.574575 | 20.352787 |
| C | 7.784378  | -4.869690 | 21.001195 |
| H | 6.939527  | -5.255910 | 20.446217 |
| C | 7.648776  | -4.685141 | 22.380945 |
| H | 6.701739  | -4.926855 | 22.857109 |
| C | 8.709617  | -4.206826 | 23.140937 |
| H | 8.602765  | -4.070420 | 24.213836 |
| C | 9.916126  | -3.904022 | 22.505666 |
| H | 10.757236 | -3.526144 | 23.081144 |
| C | 10.047916 | -4.083254 | 21.134373 |
| H | 10.988471 | -3.840189 | 20.648599 |
| C | 10.406607 | -5.743514 | 18.640173 |
| C | 10.713725 | -6.731553 | 19.588011 |
| H | 10.162495 | -6.769270 | 20.521702 |
| C | 11.718900 | -7.668619 | 19.352563 |
| H | 11.938643 | -8.417388 | 20.109312 |
| C | 12.438620 | -7.646343 | 18.160145 |
| H | 13.226765 | -8.372268 | 17.978995 |
| C | 12.137222 | -6.677854 | 17.204606 |
| H | 12.690660 | -6.642426 | 16.269678 |
| C | 11.134158 | -5.741258 | 17.444264 |
| H | 10.919411 | -4.978156 | 16.705102 |
| C | 7.042834  | -0.230613 | 18.885924 |
| C | 6.094585  | 0.198469  | 17.913020 |
| H | 5.026964  | 0.267871  | 18.089967 |

|   |           |           |           |
|---|-----------|-----------|-----------|
| C | 6.768603  | 0.720686  | 16.772922 |
| C | 8.152050  | 0.518313  | 17.010442 |
| H | 8.957222  | 0.819390  | 16.353991 |
| C | 8.321789  | -0.047091 | 18.299254 |
| H | 9.271237  | -0.266142 | 18.768788 |
| C | 6.732510  | -0.516209 | 20.352764 |
| C | 6.139194  | 0.769467  | 20.967045 |
| H | 6.832256  | 1.610152  | 20.858730 |
| H | 5.944077  | 0.623974  | 22.036256 |
| H | 5.195192  | 1.047381  | 20.486550 |
| C | 5.710366  | -1.651688 | 20.507128 |
| H | 4.787738  | -1.441035 | 19.955360 |
| H | 5.444986  | -1.785593 | 21.562039 |
| H | 6.124041  | -2.601318 | 20.152785 |
| C | 8.008598  | -0.879187 | 21.120575 |
| H | 8.500190  | -1.757444 | 20.694245 |
| H | 7.767247  | -1.104194 | 22.164524 |
| H | 8.722876  | -0.048748 | 21.115460 |
| C | 6.157105  | 1.681450  | 15.750877 |
| C | 5.661857  | 2.918266  | 16.535534 |
| H | 4.881344  | 2.648029  | 17.253380 |
| H | 5.248585  | 3.668953  | 15.850942 |
| H | 6.483002  | 3.379262  | 17.093190 |
| C | 4.958706  | 1.087093  | 14.996510 |
| H | 5.240758  | 0.203931  | 14.416076 |
| H | 4.541048  | 1.823678  | 14.300416 |
| H | 4.154677  | 0.811406  | 15.687530 |
| C | 7.199464  | 2.173953  | 14.736532 |
| H | 8.029940  | 2.680975  | 15.237300 |
| H | 6.739453  | 2.891226  | 14.048235 |
| H | 7.615762  | 1.362626  | 14.133365 |
| C | 8.713656  | -2.480553 | 14.350071 |
| C | 8.202385  | -3.796382 | 14.542348 |
| H | 8.811850  | -4.680915 | 14.678481 |
| C | 6.788998  | -3.796174 | 14.399785 |
| C | 6.409874  | -2.439993 | 14.207321 |
| H | 5.402232  | -2.084793 | 14.024063 |
| C | 7.584143  | -1.642446 | 14.161935 |
| H | 7.610178  | -0.582287 | 13.952960 |
| C | 10.160746 | -2.110057 | 14.029118 |
| C | 10.273256 | -2.060433 | 12.488654 |
| H | 9.998689  | -3.023326 | 12.045920 |
| H | 11.301707 | -1.827172 | 12.187864 |
| H | 9.612466  | -1.296754 | 12.065771 |
| C | 11.154258 | -3.149707 | 14.559079 |
| H | 11.111992 | -3.204105 | 15.650467 |
| H | 12.173599 | -2.871008 | 14.269792 |
| H | 10.958821 | -4.144978 | 14.146590 |
| C | 10.554854 | -0.738168 | 14.593478 |
| H | 9.877152  | 0.052836  | 14.256271 |
| H | 11.563420 | -0.470587 | 14.258696 |
| H | 10.562434 | -0.749542 | 15.688047 |
| C | 5.926642  | -5.019169 | 14.098784 |
| C | 6.066934  | -5.278086 | 12.580069 |
| H | 5.725405  | -4.414871 | 11.999417 |
| H | 5.469258  | -6.148668 | 12.283923 |
| H | 7.109625  | -5.473088 | 12.310019 |
| C | 6.400311  | -6.270312 | 14.848207 |
| H | 7.446597  | -6.503336 | 14.625734 |
| H | 5.803919  | -7.136802 | 14.540778 |
| H | 6.295743  | -6.157761 | 15.929207 |
| C | 4.441751  | -4.783079 | 14.406172 |
| H | 4.268748  | -4.637298 | 15.474753 |

|    |          |           |           |
|----|----------|-----------|-----------|
| H  | 3.854803 | -5.652068 | 14.088422 |
| H  | 4.047965 | -3.912879 | 13.870473 |
| N  | 4.805730 | -2.808658 | 17.330557 |
| N  | 6.876594 | -4.400519 | 17.913125 |
| S  | 9.611939 | -3.093178 | 18.136980 |
| Th | 7.307266 | -2.257497 | 16.868389 |
